# Supplementary material for: Pesticide Residues in Mandarins: Three-Year Monitoring Results
Source: MDPI journal article supplement (doi:10.3390/molecules28145611), 2023-07-24
Supplement: s1 [file s1]

# Supplementary material

**Table S1. MRM transitions and in-house validation data for 40 residues.**

| Pesticide            | Analyzed by | MRM transitions, <i>m/z</i> (collision energy, eV) |                    | Recovery (%)             |                          | Repeatability (%RSD <sub>r</sub> , <i>n</i> =6) |                          | Within-laboratory reproducibility (%RSD <sub>R</sub> , <i>n</i> =12) |                          | <i>U</i> (%) |
|----------------------|-------------|----------------------------------------------------|--------------------|--------------------------|--------------------------|-------------------------------------------------|--------------------------|----------------------------------------------------------------------|--------------------------|--------------|
|                      |             | quantification                                     | qualification      | 0.01 mg kg <sup>-1</sup> | 0.05 mg kg <sup>-1</sup> | 0.01 mg kg <sup>-1</sup>                        | 0.05 mg kg <sup>-1</sup> | 0.01 mg kg <sup>-1</sup>                                             | 0.05 mg kg <sup>-1</sup> |              |
| 2-Phenylphenol       | GC-MS/MS    | 169.0 → 141.1 (15)                                 | 169.0 → 115.1 (25) | 101.1                    | 94.4                     | 6.12                                            | 2.67                     | 4.47                                                                 | 3.25                     | 15.5         |
| Acetamiprid          | LC-MS/MS    | 223.1 → 126.1 (17)                                 | 223.1 → 56.2 (11)  | 85.6                     | 94.4                     | 1.38                                            | 0.48                     | 1.34                                                                 | 2.69                     | 25.4         |
| Azoxystrobin         | LC-MS/MS    | 404.2 → 372.2 (9)                                  | 404.2 → 344.2 (23) | 92.7                     | 92.8                     | 0.86                                            | 0.51                     | 1.74                                                                 | 3.01                     | 19.6         |
| Bifenthrin*          | LC-MS/MS    | 440.2 → 181.1 (7)                                  | 440.2 → 166.1 (20) | 84.8                     | 103.3                    | 5.01                                            | 2.34                     | 3.34                                                                 | 2.65                     | 26.3         |
| Boscalid             | LC-MS/MS    | 345.1 → 309.0 (15)                                 | 343.1 → 307.0 (17) | 92.9                     | 91.6                     | 1.90                                            | 0.90                     | 2.71                                                                 | 3.02                     | 22.7         |
| Buprofezin           | LC-MS/MS    | 306.2 → 201.0 (10)                                 | 306.2 → 116.1 (21) | 89.6                     | 98.1                     | 0.95                                            | 0.63                     | 1.72                                                                 | 2.87                     | 18.4         |
| Carbendazim*         | LC-MS/MS    | 192.1 → 160.1 (15)                                 | 192.1 → 132.1 (33) | 91.1                     | 92.1                     | 1.18                                            | 0.34                     | 0.62                                                                 | 3.29                     | 14.5         |
| Chlorpyrifos*        | LC-MS/MS    | 351.9 → 199.9 (15)                                 | 349.9 → 199.7 (15) | 103.6                    | 102.8                    | 4.13                                            | 0.59                     | 5.64                                                                 | 3.06                     | 14.8         |
| Chlorpyrifos-methyl* | LC-MS/MS    | 324.0 → 125.0 (13)                                 | 322.0 → 125.0 (21) | 99.8                     | 98.5                     | 6.17                                            | 2.28                     | 8.78                                                                 | 3.49                     | 20.3         |
| Cyantraniliprole     | LC-MS/MS    | 474.9 → 286.1 (10)                                 | 472.9 → 284.1 (10) | 82.9                     | 93.5                     | 6.43                                            | 1.55                     | 5.80                                                                 | 3.66                     | 31.8         |
| Cypermethrin         | LC-MS/MS    | 435.0 → 193.0 (12)                                 | 433.0 → 191.0 (12) | 96.1                     | 102.4                    | 14.67                                           | 8.41                     | 13.56                                                                | 6.65                     | 36.4         |
| Deltamethrin         | LC-MS/MS    | 522.8 → 505.8 (6)                                  | 522.8 → 280.6 (12) | 113.5                    | 109.4                    | 3.91                                            | 1.58                     | 8.07                                                                 | 2.30                     | 20.5         |
| Difenoconazole       | LC-MS/MS    | 406.2 → 337.1 (13)                                 | 406.2 → 251.1 (23) | 90.8                     | 96.9                     | 2.32                                            | 0.31                     | 1.70                                                                 | 3.45                     | 19.4         |
| Esfenvalerate        | LC-MS/MS    | 439.0 → 169.0 (17)                                 | 437.0 → 167.0 (14) | 89.2                     | 105.0                    | 16.31                                           | 1.80                     | 12.54                                                                | 1.73                     | 28.0         |
| Etoxazole            | LC-MS/MS    | 360.0 → 141.0 (15)                                 | 360.0 → 113.0 (23) | 105.4                    | 109.9                    | 0.84                                            | 0.65                     | 1.53                                                                 | 2.84                     | 14.9         |
| Fenbutatin-oxide*    | LC-MS/MS    | 519.3 → 351.1 (35)                                 | 519.3 → 197.0 (55) | 100.1                    | 103.8                    | 3.77                                            | 0.56                     | 3.00                                                                 | 2.35                     | 10.4         |
| Flonicamid           | LC-MS/MS    | 230.1 → 203.1 (14)                                 | 230.1 → 148.0 (32) | 80.4                     | 92.8                     | 3.53                                            | 1.12                     | 3.44                                                                 | 2.66                     | 34.5         |
| Fludioxonil          | LC-MS/MS    | 247.0 → 180.0 (33)                                 | 247.0 → 126.0 (34) | 74.1                     | 93.5                     | 7.16                                            | 3.21                     | 3.25                                                                 | 4.28                     | 42.2         |
| Fluopyram            | LC-MS/MS    | 397.0 → 208.0 (20)                                 | 397.0 → 173.0 (30) | 89.4                     | 94.9                     | 2.41                                            | 0.78                     | 2.26                                                                 | 2.77                     | 22.2         |
| Fosetyl              | LC-MS/MS    | 109.0 → 81.0 (12)                                  | 109.0 → 63.0 (34)  | 99.0                     | 86.5                     | 7.61                                            | 5.25                     | 7.67                                                                 | 2.39                     | 19.4         |
| Imazalil             | LC-MS/MS    | 297.1 → 159.0 (19)                                 | 297.1 → 41.2 (31)  | 91.6                     | 94.8                     | 0.84                                            | 0.76                     | 1.50                                                                 | 2.75                     | 19.7         |
| Imidacloprid*        | LC-MS/MS    | 256.1 → 209.0 (10)                                 | 256.1 → 175.0 (12) | 85.5                     | 93.2                     | 1.94                                            | 0.37                     | 1.19                                                                 | 2.90                     | 25.9         |
| Lambda-cyhalothrin   | LC-MS/MS    | 467.1 → 450.0 (6)                                  | 467.1 → 225.0 (14) | 107.4                    | 107.0                    | 5.83                                            | 2.78                     | 7.73                                                                 | 2.78                     | 19.9         |
| Malathion            | LC-MS/MS    | 330.9 → 285.0 (0)                                  | 330.9 → 127.0 (4)  | 79.7                     | 95.5                     | 6.37                                            | 1.07                     | 3.79                                                                 | 3.08                     | 30.8         |
| Novaluron*           | LC-MS/MS    | 492.7 → 158.0 (12)                                 | 492.7 → 140.7 (46) | 91.6                     | 99.9                     | 3.92                                            | 1.59                     | 5.77                                                                 | 2.34                     | 15.8         |
| Phosmet*             | LC-MS/MS    | 317.9 → 160.0 (21)                                 | 317.9 → 133.0 (28) | 91.8                     | 95.3                     | 0.92                                            | 1.14                     | 1.97                                                                 | 2.79                     | 18.9         |
| Phosphonic acid      | LC-MS/MS    | 81.0 → 79.0 (15)                                   | 81.0 → 63.0 (35)   | 101.1                    | 105.8                    | 3.09                                            | 3.12                     | 4.66                                                                 | 2.68                     | 12.1         |
| Pirimicarb           | LC-MS/MS    | 239.2 → 182.1 (11)                                 | 239.2 → 72.1 (15)  | 91.5                     | 95.6                     | 1.20                                            | 0.56                     | 1.98                                                                 | 2.92                     | 19.2         |
| Propiconazole*       | LC-MS/MS    | 342.2 → 159.0 (27)                                 | 342.2 → 69.2 (17)  | 77.6                     | 92.8                     | 6.64                                            | 1.51                     | 5.13                                                                 | 3.38                     | 39.0         |

|                     |          |                    |                    |       |       |      |      |      |      |      |
|---------------------|----------|--------------------|--------------------|-------|-------|------|------|------|------|------|
| Pyridaben           | LC-MS/MS | 365.2 → 309.1 (7)  | 365.2 → 147.1 (23) | 102.6 | 104.6 | 1.42 | 1.39 | 1.40 | 2.61 | 8.5  |
| Pyrimethanil        | LC-MS/MS | 200.0 → 107.0 (26) | 200.0 → 82.0 (28)  | 90.6  | 95.9  | 0.66 | 0.82 | 4.97 | 2.67 | 22.9 |
| Pyriproxyfen        | LC-MS/MS | 322.2 → 185.0 (19) | 322.2 → 96.1 (11)  | 97.5  | 106.5 | 1.58 | 0.77 | 1.81 | 2.62 | 8.8  |
| Spinosad            | LC-MS/MS | 732.5 → 142.1 (35) | 732.5 → 98.0 (55)  | 102.4 | 98.6  | 0.70 | 0.67 | 1.52 | 2.13 | 10.4 |
| Spirodiclofen*      | LC-MS/MS | 411.0 → 313.0 (11) | 411.0 → 71.0 (16)  | 98.6  | 99.2  | 1.11 | 0.27 | 9.28 | 3.89 | 29.5 |
| Spirotetramat       | LC-MS/MS | 374.1 → 330.1 (21) | 374.1 → 302.1 (23) | 89.9  | 91.3  | 1.29 | 0.73 | 2.03 | 2.48 | 24.5 |
| Sulfoxaflor         | LC-MS/MS | 277.9 → 174.0 (2)  | 277.9 → 154.0 (29) | 89.0  | 95.3  | 1.45 | 0.97 | 1.68 | 3.11 | 21.9 |
| Tau-fluvalinate     | LC-MS/MS | 503.1 → 208.1 (15) | 503.1 → 181.1 (25) | 102.6 | 108.9 | 1.42 | 2.43 | 4.69 | 3.28 | 15.3 |
| Tetraconazole       | LC-MS/MS | 372.0 → 159.0 (35) | 372.0 → 70.0 (20)  | 73.9  | 93.6  | 4.54 | 1.01 | 7.61 | 3.03 | 42.8 |
| Thiacloprid*        | LC-MS/MS | 253.0 → 126.0 (16) | 253.0 → 90.0 (35)  | 91.1  | 93.9  | 1.23 | 0.52 | 1.16 | 2.73 | 20.2 |
| Thiophanate-methyl* | LC-MS/MS | 343.0 → 151.0 (20) | 343.0 → 93.0 (56)  | 105.8 | 97.8  | 0.20 | 0.30 | 5.54 | 2.44 | 15.1 |

\*Not approved in the EU.
